# Supplementary material
Source: MDPI journal article supplement (https://www.mdpi.com/2072-4292/10/9/1393)

## Supplementary Figure

Figure S1. Histogram of sampling times for all Chesapeake Bay program TSS data at or above 1 meter depth for years 2003-2016. Times shown are Eastern Standard Time.

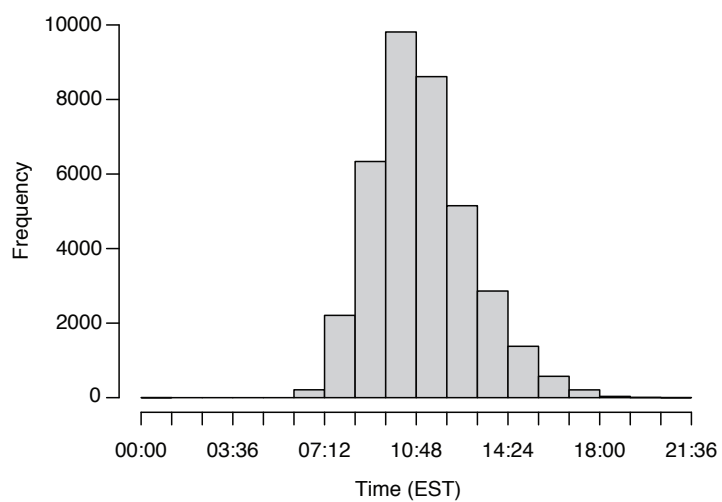

Supplement: s1 [file s1]
